# Supplementary material for: Historical Mitogenomic Diversity and Population Structuring of Southern Hemisphere Fin Whales
Source: MDPI journal article supplement (doi:10.3390/genes14051038), 2023-05-03

# SUPPLEMENTARY MATERIAL FOR MANUSCRIPT: HISTORICAL MITOGENOMIC DIVERSITY AND POPULATION STRUCTURING OF SOUTHERN HEMISPHERE FIN WHALES

DANIELLE L. BUSS, LANE M. ATMORE, MARIA ZICOS, WILLIAM P. GOODALL-COPESTAKE,  
SELINA BRACE, FREDERICK I. ARCHER, C. SCOTT BAKER, IAN BARNES, EMMA L.  
CARROLL, TOM HART, ANDREW KITCHENER, RICHARD SABIN, ANGIE SREMBBA, CAROLINE  
R. WEIR, JENNIFER A. JACKSON

**Supplementary Table S1** Metadata for mitogenomes obtained from historical whalebones and baleen of fin whale, *Balaenoptera physalus*, using next-generation sequencing ( $n=34$ ).

| #  | Sample Name    | Tissue | Location                   | Sample Store                    | No. aligned | Coverage | Mean read depth | STD read depth | Min | Max | Full Alignment | Partial Alignment | Endogenous content |
|----|----------------|--------|----------------------------|---------------------------------|-------------|----------|-----------------|----------------|-----|-----|----------------|-------------------|--------------------|
| 1  | SI027          | Bone   | South Orkneys              | BAS specimen store              | 3090        | 100      | 15.1            | 1.3            | 13  | 17  | TRUE           | TRUE              | 28.0 %             |
| 2  | BH01           | Baleen | South Georgia              | Bob Headland private collection | 1300        | 99.94    | 7.9             | 0.9            | 0   | 9   | FALSE          | TRUE              | 13.1 %             |
| 3  | NHMK ZD.2023.9 | Bone   | South Africa               | Natural history museum, London  | 5554        | 100      | 25.3            | 1              | 24  | 26  | TRUE           | TRUE              | 54.9 %             |
| 4  | DCO004         | Bone   | South Shetlands            | BAS specimen store              | 2302        | 100      | 9.9             | 1.1            | 9   | 12  | TRUE           | TRUE              | 52.9 %             |
| 5  | DCO019         | Bone   | South Shetlands            | BAS specimen store              | 3084        | 99.9     | 14.2            | 4.7            | 0   | 32  | TRUE           | TRUE              | 1.6 %              |
| 6  | SI041          | Bone   | South Orkneys              | BAS specimen store              | 2279        | 99.98    | 10.5            | 4.2            | 0   | 29  | FALSE          | TRUE              | 19.0 %             |
| 7  | FKB14          | Bone   | Falkland Islands           | BAS specimen store              | 337         | 81.1     | 1.5             | 1.1            | 0   | 7   | FALSE          | FALSE             | 6.8 %              |
| 8  | FKPT           | Bone   | Falkland Islands           | BAS specimen store              | 444         | 88.2     | 2               | 1.3            | 0   | 7   | FALSE          | FALSE             | 3.6 %              |
| 9  | DCO36          | Bone   | South Shetlands            | BAS specimen store              | 2972        | 99.99    | 13.7            | 4.8            | 1   | 31  | FALSE          | TRUE              | 34.5 %             |
| 10 | BLJS01         | Baleen | South Shetlands            | John Smellie private collection | 2588        | 99.99    | 12.5            | 0.5            | 2   | 13  | FALSE          | TRUE              | 45.1 %             |
| 11 | SI025A*        | Bone   | South Orkneys              | BAS specimen store              | 633         | 97.7     | 3               | 1.9            | 0   | 11  | FALSE          | FALSE             | 6.9 %              |
| 12 | SI026          | Bone   | South Orkneys              | BAS specimen store              | 973         | 99.4     | 4.5             | 2.6            | 0   | 14  | FALSE          | FALSE             | 8.3 %              |
| 13 | DCO11          | Bone   | South Shetlands            | BAS specimen store              | 7190        | 100      | 28.1            | 0.8            | 27  | 29  | TRUE           | TRUE              | 50.5 %             |
| 14 | SI038          | Bone   | South Orkneys              | BAS specimen store              | 2156        | 100      | 10.7            | 3.4            | 2   | 24  | TRUE           | TRUE              | 5.2 %              |
| 15 | NHMK ZD.2023.3 | Bone   | 63°06'S 82°11'E (Area III) | Natural history museum, London  | 5167        | 100      | 24.2            | 5.5            | 9   | 41  | TRUE           | TRUE              | 37.2 %             |
| 16 | FKB38          | Bone   | Falkland Islands           | BAS specimen store              | 1109        | 99.79    | 4               | 0.7            | 0   | 4   | FALSE          | FALSE             | 9.2 %              |

|    |                    |        |                  |                                        |       |       |       |      |     |     |       |       |        |
|----|--------------------|--------|------------------|----------------------------------------|-------|-------|-------|------|-----|-----|-------|-------|--------|
| 17 | NHMUK ZD 1847-25-1 | Bone   | United Kingdom   | Natural history museum, London         | 3081  | 99.99 | 9     | 0    | 9   | 9   | FALSE | TRUE  | 1.7 %  |
| 18 | NMS Z.1991.83.2    | Bone   | South Shetlands  | National museum of Scotland, Edinburgh | 5187  | 100   | 32.4  | 1.4  | 30  | 34  | TRUE  | TRUE  | 41.5 % |
| 19 | GO146              | Bone   | South Georgia    | BAS specimen store                     | 1776  | 99.96 | 7.6   | 2.6  | 0   | 20  | FALSE | TRUE  | 57.7 % |
| 20 | BALL01             | Baleen | South Georgia    | Bob Headland private collection        | 3266  | 99.98 | 15    | 5.4  | 0   | 37  | TRUE  | TRUE  | 4.9 %  |
| 21 | DCO40              | Bone   | South Shetlands  | BAS specimen store                     | 8438  | 100   | 37.3  | 1    | 36  | 40  | TRUE  | TRUE  | 17.0 % |
| 22 | SI034              | Bone   | South Orkneys    | BAS specimen store                     | 2541  | 99.99 | 18.9  | 0.3  | 18  | 19  | FALSE | TRUE  | 5.4 %  |
| 23 | SI046              | Bone   | South Orkneys    | BAS specimen store                     | 817   | 99.4  | 3.8   | 2.4  | 0   | 14  | FALSE | FALSE | 5.4 %  |
| 24 | DCO27              | Bone   | South Shetlands  | BAS specimen store                     | 3778  | 100   | 15.7  | 0.8  | 15  | 17  | TRUE  | TRUE  | 26.3 % |
| 25 | DCO37              | Bone   | South Shetlands  | BAS specimen store                     | 4385  | 99.9  | 20.1  | 5.7  | 0   | 37  | TRUE  | TRUE  | 31.4 % |
| 26 | FKB16              | Bone   | Falkland Islands | BAS specimen store                     | 946   | 99.8  | 3.1   | 2.2  | 0   | 12  | FALSE | FALSE | 3.1 %  |
| 27 | FKB3               | Bone   | Falkland Islands | BAS specimen store                     | 14428 | 99.99 | 66.8  | 11.9 | 0   | 112 | TRUE  | TRUE  | 46.7%  |
| 28 | FKPD               | Bone   | Falkland Islands | BAS specimen store                     | 16188 | 100   | 57.8  | 2.9  | 53  | 62  | TRUE  | TRUE  | 14.4 % |
| 29 | GO002              | Bone   | South Georgia    | BAS specimen store                     | 7457  | 100   | 30.8  | 0.8  | 30  | 32  | TRUE  | TRUE  | 16.2 % |
| 30 | SI042              | Bone   | South Orkneys    | BAS specimen store                     | 10310 | 100   | 47.5  | 1.8  | 45  | 50  | TRUE  | TRUE  | 8.7 %  |
| 31 | DCO20              | Bone   | South Shetlands  | BAS specimen store                     | 57902 | 100   | 224.5 | 2.2  | 219 | 227 | TRUE  | TRUE  | 51.0 % |
| 32 | DCO013             | Bone   | South Shetlands  | BAS specimen store                     | 5612  | 100   | 21.7  | 0.5  | 21  | 22  | TRUE  | TRUE  | 27.9 % |
| 33 | SI021              | Bone   | South Orkneys    | BAS specimen store                     | 2126  | 100   | 10    | 0.1  | 10  | 11  | FALSE | TRUE  | 18.2 % |
| 34 | SI014              | Bone   | South Orkneys    | BAS specimen store                     | 1912  | 99.9  | 8.8   | 3.1  | 0   | 23  | FALSE | TRUE  | 16.9 % |

\*This sample had many instances of multiple nucleotides at the same base with a read depth of 3 or more and therefore was potentially contaminated and removed

**Supplementary Table S2** Metadata for *mtDNA CR* obtained from historical whalebones and baleen of fin whale, *Balaenoptera physalus*, using sanger PCR sequencing ( $n=50$ ). If *mito* = TRUE; mitogenome data also available.

| # | SampleName | Tissue | Collection site | Storage location                | Ocean basin | mito |
|---|------------|--------|-----------------|---------------------------------|-------------|------|
| 1 | SI027      | Bone   | South Orkneys   | BAS specimen store              | SA          | TRUE |
| 2 | BH01       | Baleen | South Georgia   | Bob Headland private collection | SA          | TRUE |

|    |                         |        |                  |                                              |    |       |
|----|-------------------------|--------|------------------|----------------------------------------------|----|-------|
| 3  | NHMUK<br>ZD.2023.9      | Bone   | South Africa     | Natural history<br>museum, London            | SA | TRUE  |
| 4  | DCO004                  | Bone   | South Shetlands  | BAS specimen store                           | SP | TRUE  |
| 5  | DCO019                  | Bone   | South Shetlands  | BAS specimen store                           | SP | TRUE  |
| 6  | SI041                   | Bone   | South Orkneys    | BAS specimen store                           | SA | TRUE  |
| 7  | FKB14                   | Bone   | Falkland Islands | BAS specimen store                           | SA | FALSE |
| 8  | FKPT                    | Bone   | Falkland Islands | BAS specimen store                           | SA | FALSE |
| 9  | DCO36                   | Bone   | South Shetlands  | BAS specimen store                           | SP | TRUE  |
| 10 | BLJS01                  | Baleen | South Shetlands  | John Smellie<br>private collection           | SP | TRUE  |
| 11 | SI025A                  | Bone   | South Orkneys    | BAS specimen store                           | SA | FALSE |
| 12 | SI026                   | Bone   | South Orkneys    | BAS specimen store                           | SA | FALSE |
| 13 | DCO11                   | Bone   | South Shetlands  | BAS specimen store                           | SP | TRUE  |
| 14 | SI038                   | Bone   | South Orkneys    | BAS specimen store                           | SA | TRUE  |
| 15 | NHMUK<br>ZD.2023.3      | Bone   | 63°06'S 82°11'E  | Natural history<br>museum, London            | SA | TRUE  |
| 16 | FKB38                   | Bone   | Falkland Islands | BAS specimen store                           | SA | FALSE |
| 17 | NHMUK ZD<br>1847-2-25-1 | Bone   | United kingdom   | Natural history<br>museum, London            | NA | TRUE  |
| 18 | NMS<br>Z.1991.83.2      | Bone   | South Shetlands  | National museum of<br>Scotland,<br>Edinburgh | SP | TRUE  |
| 19 | GO146                   | Bone   | South Georgia    | BAS specimen store                           | SA | TRUE  |
| 20 | BALL01                  | Baleen | South Georgia    | Bob Headland<br>private collection           | SA | TRUE  |
| 21 | DCO40                   | Bone   | South Shetlands  | BAS specimen store                           | SP | TRUE  |
| 22 | SI034                   | Bone   | South Orkneys    | BAS specimen store                           | SA | TRUE  |
| 23 | SI046                   | Bone   | South Orkneys    | BAS specimen store                           | SA | FALSE |
| 24 | DCO27                   | Bone   | South Shetlands  | BAS specimen store                           | SP | TRUE  |
| 25 | DCO37                   | Bone   | South Shetlands  | BAS specimen store                           | SP | TRUE  |
| 26 | FKB16                   | Bone   | Falkland Islands | BAS specimen store                           | SA | FALSE |
| 27 | FKB3                    | Bone   | Falkland Islands | BAS specimen store                           | SA | TRUE  |
| 28 | FKPD                    | Bone   | Falkland Islands | BAS specimen store                           | SA | TRUE  |
| 29 | GO002                   | Bone   | South Georgia    | BAS specimen store                           | SA | TRUE  |

|    |                         |      |                  |                    |    |       |
|----|-------------------------|------|------------------|--------------------|----|-------|
| 30 | SI042                   | Bone | South Orkneys    | BAS specimen store | SA | TRUE  |
| 31 | DCO20                   | Bone | South Shetlands  | BAS specimen store | SP | TRUE  |
| 32 | DCO013                  | Bone | South Shetlands  | BAS specimen store | SP | TRUE  |
| 33 | SI021                   | Bone | South Orkneys    | BAS specimen store | SA | TRUE  |
| 34 | SI014                   | Bone | South Orkneys    | BAS specimen store | SA | TRUE  |
| 35 | WBF02                   | Bone | South Shetlands  | BAS specimen store | SP | FALSE |
| 36 | SI048                   | Bone | South Orkneys    | BAS specimen store | SA | FALSE |
| 37 | SI047                   | Bone | South Orkneys    | BAS specimen store | SA | FALSE |
| 38 | SI046                   | Bone | South Orkneys    | BAS specimen store | SA | FALSE |
| 39 | SI044                   | Bone | South Orkneys    | BAS specimen store | SA | FALSE |
| 40 | NHMUK ZD<br>1910-9-24-1 | Bone | Ireland          | BAS specimen store | NA | FALSE |
| 41 | SI040                   | Bone | South Orkneys    | BAS specimen store | SA | FALSE |
| 42 | SI031                   | Bone | South Orkneys    | BAS specimen store | SA | FALSE |
| 43 | SI005                   | Bone | South Orkneys    | BAS specimen store | SA | FALSE |
| 44 | SI003                   | Bone | South Orkneys    | BAS specimen store | SA | FALSE |
| 45 | SI002                   | Bone | South Orkneys    | BAS specimen store | SA | FALSE |
| 46 | SI001                   | Bone | South Orkneys    | BAS specimen store | SA | FALSE |
| 47 | KEC7                    | Bone | South Georgia    | BAS specimen store | SA | FALSE |
| 48 | FKPEE                   | Bone | Falkland Islands | BAS specimen store | SA | FALSE |
| 49 | FKB84                   | Bone | Falkland Islands | BAS specimen store | SA | FALSE |
| 50 | FKB17                   | Bone | Falkland Islands | BAS specimen store | SA | FALSE |

**Supplementary Table S3** PCR primer sequences and cycler conditions used for amplification of historical fin whale mitochondrial control region (*mtDNA CR*) sequences.

| Forward primer (seq)                                                                                                                                                                                                                                                                                                                                                                                                 | Reverse primer (seq)                         | Nucleotide base pairs | Source of primer seq.                      |
|----------------------------------------------------------------------------------------------------------------------------------------------------------------------------------------------------------------------------------------------------------------------------------------------------------------------------------------------------------------------------------------------------------------------|----------------------------------------------|-----------------------|--------------------------------------------|
| Tprowhale<br>5'TCACCCAAAGCTG<br>RARTTCTA 3'                                                                                                                                                                                                                                                                                                                                                                          | Dlp8G<br>5' GGAGTACTATG<br>TCCTGTAACCA 3'    | 800                   | Baker et al. 1998;<br>Garrigue et al. 2004 |
| Tprowhale<br>5'TCACCCAAAGCTG<br>RARTTCTA 3'                                                                                                                                                                                                                                                                                                                                                                          | Dlp5<br>5'CCATCGWGATGTCT<br>TATTAAAGRGGAA 3' | 500                   | Baker et al. 1998                          |
| Tprowhale<br>5'TCACCCAAAGCTG<br>RARTTCTA 3'                                                                                                                                                                                                                                                                                                                                                                          | Dlp4<br>5'GCGGGWTRYTGRT<br>TTCACG 3'         | 300                   | Baker et al. 1998; Ross et<br>al. 2003     |
| <p>PCR amplifications were conducted in 20uL reactions containing 1.1 x QSolution (Qiagen), 0.25mM dNTP mix, 1uM of each primer, 1 x buffer (4mM MgCL2, Takara), 1.5mM additional MgCL2 (Qiagen), 0.15 u/uL Takara hot start TAQ and 1.5uL of gDNA extract. PCR conditions: denaturation at 94°C for 240 s; 38 cycles of 94°C for 45 s, 56°C for 45 s and 72°C for 60 s. Final extension of 72°C for 10 minutes.</p> |                                              |                       |                                            |

**Supplementary Table S4** Best model of evolution for mitogenome partitions determined using PartitionFinder2 for historic (n=27; this study) and contemporary (n=154; Archer et al. 2013) fin whale mitogenomes.

| Subset | Partitions/Genes                                   | Best model from Partition Finder 2 |
|--------|----------------------------------------------------|------------------------------------|
| 1      | DLoop_all                                          | GTR+I+G                            |
| 2      | 16S_rRNA, all tRNAs                                | GTR+I+G                            |
| 3      | ND1_pos1, 12S_rRNA, ND4L_pos1, CYTB_pos1, ND5_pos1 | TRN+I+G                            |
| 4      | ND2_pos2, ND4L_pos2, ND4_pos2, ND1_pos2            | TVM+I+G                            |
| 5      | ND4_pos3, ATP8_pos3, ND2_pos3, ND1_pos3            | TRN+I                              |
| 6      | ND2_pos1, ND6_pos2                                 | TIM+I                              |
| 7      | COXI_pos1                                          | TRN+I                              |
| 8      | COXIII_pos2, COXI_pos2, ND3_pos2, CYTB_pos2        | HKY                                |
| 9      | COXI_pos3, ATP6_pos3                               | TIM+G                              |
| 10     | COXIII_pos1, COXII_pos1, ND3_pos1                  | TIMEF+I                            |

|    |                                             |       |
|----|---------------------------------------------|-------|
| 11 | ATP6_pos2, ND5_pos2, COXII_pos2             | TRN+I |
| 12 | ND3_pos3, ND6_pos1, COXII_pos3              | TRN   |
| 13 | ATP8_pos2, ND6_pos3, ATP8_pos1              | TRN+G |
| 14 | ND4_pos1, ATP6_pos1                         | TRN+G |
| 15 | ND4L_pos3, CYTB_pos3, ND5_pos3, COXIII_pos3 | TRN+G |

|                                                               |                                             |                             |            |    |    |         |                                              |               |              |              |
|---------------------------------------------------------------|---------------------------------------------|-----------------------------|------------|----|----|---------|----------------------------------------------|---------------|--------------|--------------|
| Eastern South Pacific (SP <sub>hist</sub> )                   | 365                                         | Tamura & Nei (gamma = 0.39) | This study | 14 | 13 | 16 {2}  | 0.99 (0.03)                                  | 0.015 (0.008) | 0.06 (0.54)  | -10.5 (0.00) |
| Western South Atlantic (SA <sub>hist</sub> )                  | 365                                         | Tamura & Nei (gamma = 0.39) | This study | 32 | 22 | 26 {12} | 0.97 (0.02)                                  | 0.016 (0.008) | -0.55 (0.32) | -25.4 (0.00) |
| All historical SHFW combined                                  | 365                                         | Tamura & Nei (gamma = 0.39) | This study | 46 | 33 | 28      | 0.98 (0.01)                                  | 0.016 (0.008) | -0.52 (0.34) | -24.7 (0.00) |
| <b>B) Genetic differentiation of <i>mtDNA CR</i> (365 bp)</b> |                                             |                             |            |    |    |         |                                              |               |              |              |
|                                                               | Eastern South Pacific (SP <sub>hist</sub> ) |                             |            |    |    |         | Western South Atlantic (SA <sub>hist</sub> ) |               |              |              |
| Eastern South Pacific (SP <sub>hist</sub> )                   |                                             |                             |            |    |    |         | 0.02 (0.02)                                  |               |              |              |
| Western South Atlantic (SA <sub>hist</sub> )                  | 0.015 (0.20)                                |                             |            |    |    |         |                                              |               |              |              |

**Supplementary Table S7** Pairwise genetic differentiation oceanic comparison of historical and contemporary SHFW fin whale *mito* sequences.  $\Phi_{ST}$  estimates are shown below the diagonal. Differences in haplotype frequencies (Fst) are shown above the diagonal. *p*-values denoting significance are shown in parentheses.

|                         |                        |                         |
|-------------------------|------------------------|-------------------------|
|                         | Circumpolar (pre-1986) | Circumpolar (post-1986) |
| Circumpolar (pre-1986)  |                        | 0.01 (0.4)              |
| Circumpolar (post-1986) | -0.005 (0.8)           |                         |

**Supplementary Table S8** Pairwise genetic differentiation oceanic comparison of historical and contemporary SHFW fin whale *mtDNA CR* sequences.  $\Phi_{ST}$  estimates are shown below the diagonal. Differences in haplotype frequencies (Fst) are shown above the diagonal. *p*-values denoting significance are shown in parentheses.

|                         |                        |                         |
|-------------------------|------------------------|-------------------------|
|                         | Circumpolar (pre-1986) | Circumpolar (post-1986) |
| Circumpolar (pre-1986)  |                        | 0.02 (0.0)              |
| Circumpolar (post-1986) | -0.003 (0.6)           |                         |

**Supplementary Figure S1** Results from PMD tools *mapdamage*.

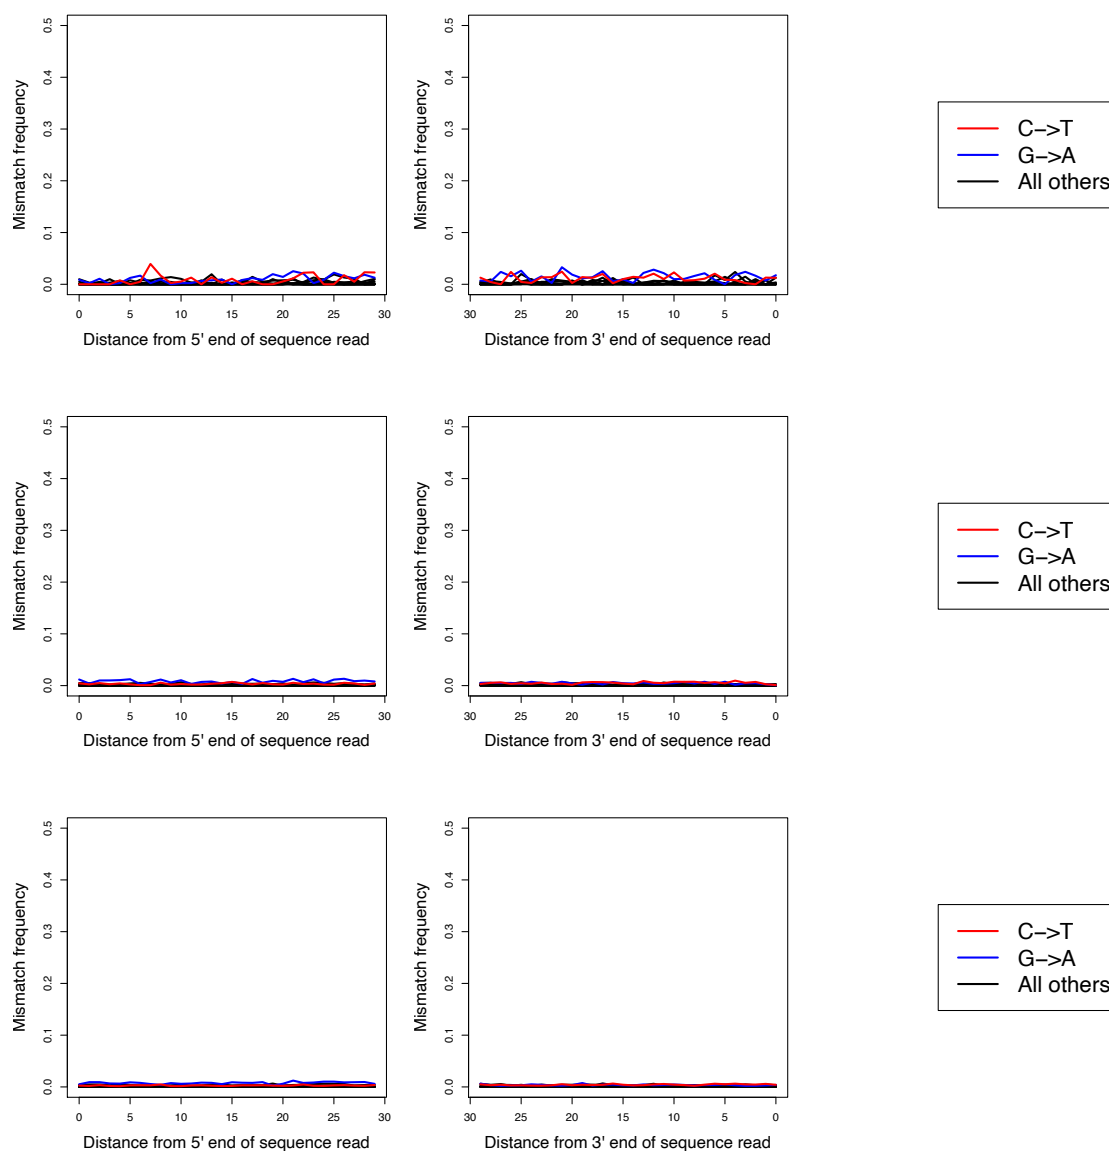



**Supplementary Figure S2** Median-joining haplotype network of fin whale *mtDNA* CR sequences (241bp). Sequences originated from the North Pacific (oceanic only – NoGoC), the North Pacific (gulf of California only, GoC), North Atlantic (oceanic only), the Mediterranean, and the Southern Hemisphere.

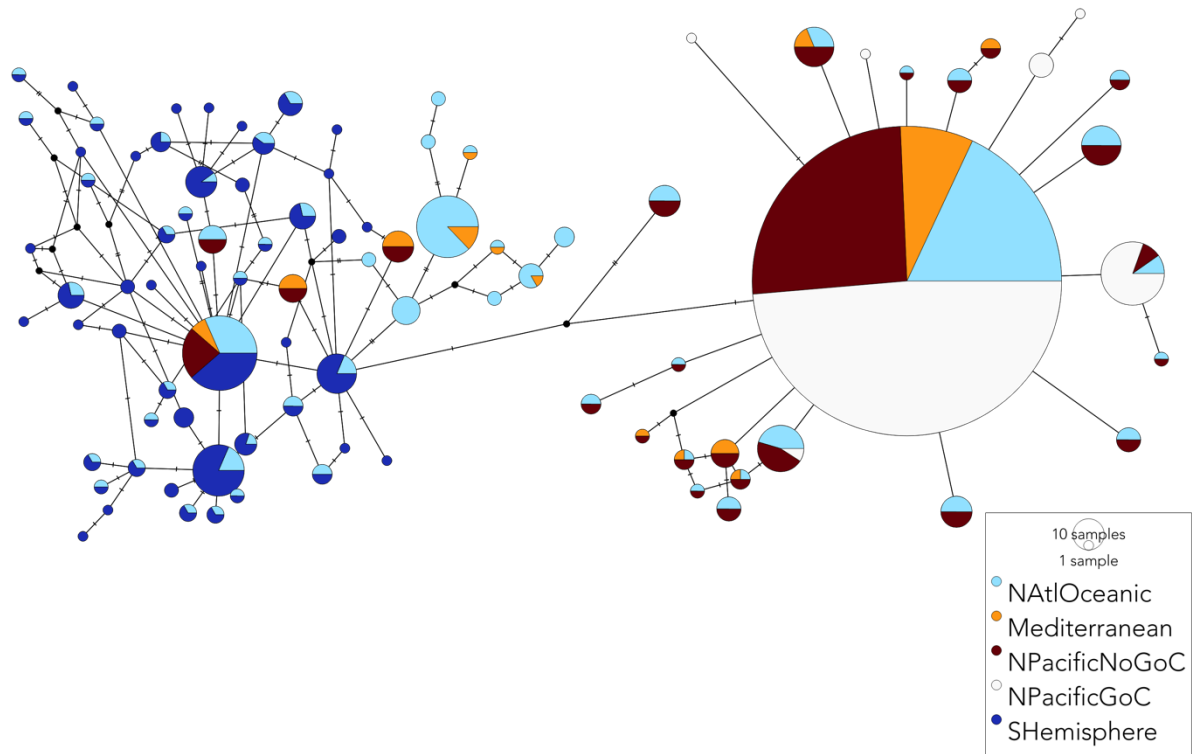

### Supplementary Figure S3 MCMC tracer file for phylogenetic analysis performed in mrBayes.

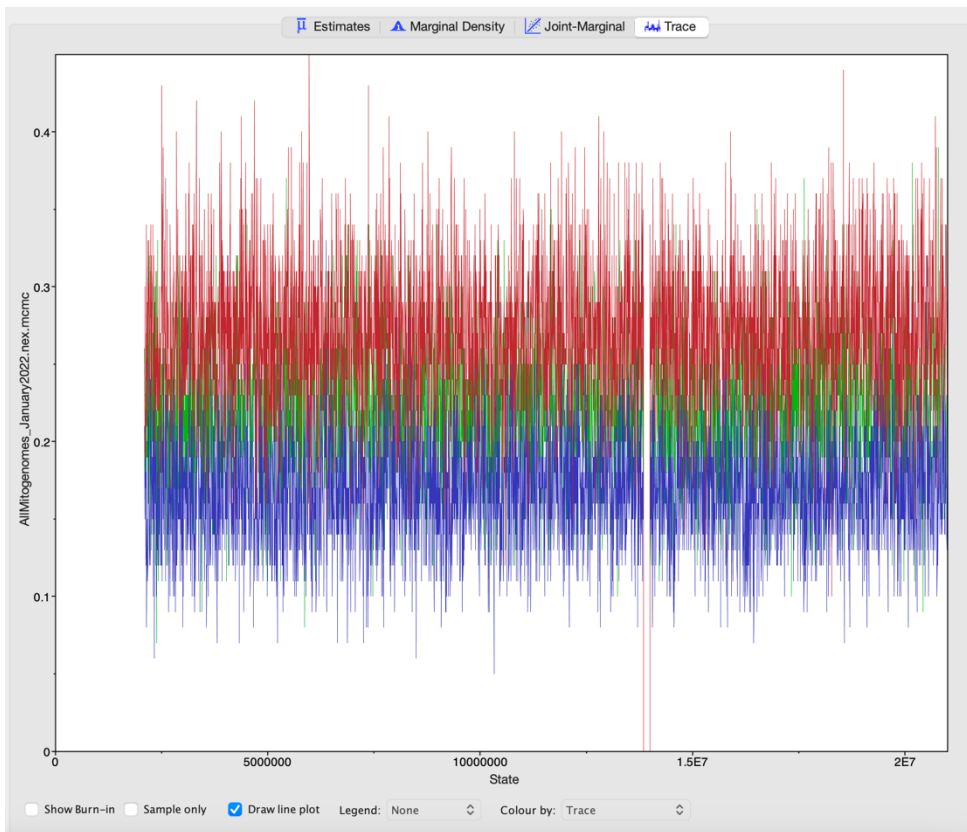

### Supplementary Figure S4

Bayesian genealogy estimated using the fin whale mitogenomic sequences, coloured by SHFW sampling sites (grey – North Pacific; light blue – North Atlantic; black – humpback whale outgroup; dark red – eastern South Atlantic; dark gold – western South Atlantic; dark blue – Antarctic Peninsula and South Shetland Islands; green – low latitudes of South Pacific; teal – sub-Antarctic waters in the Indo-Pacific). [See separate file].

### Supplementary Figure S5

Bayesian genealogy estimated using the fin whale mitogenomic sequences showing all posterior support values [See separate file].



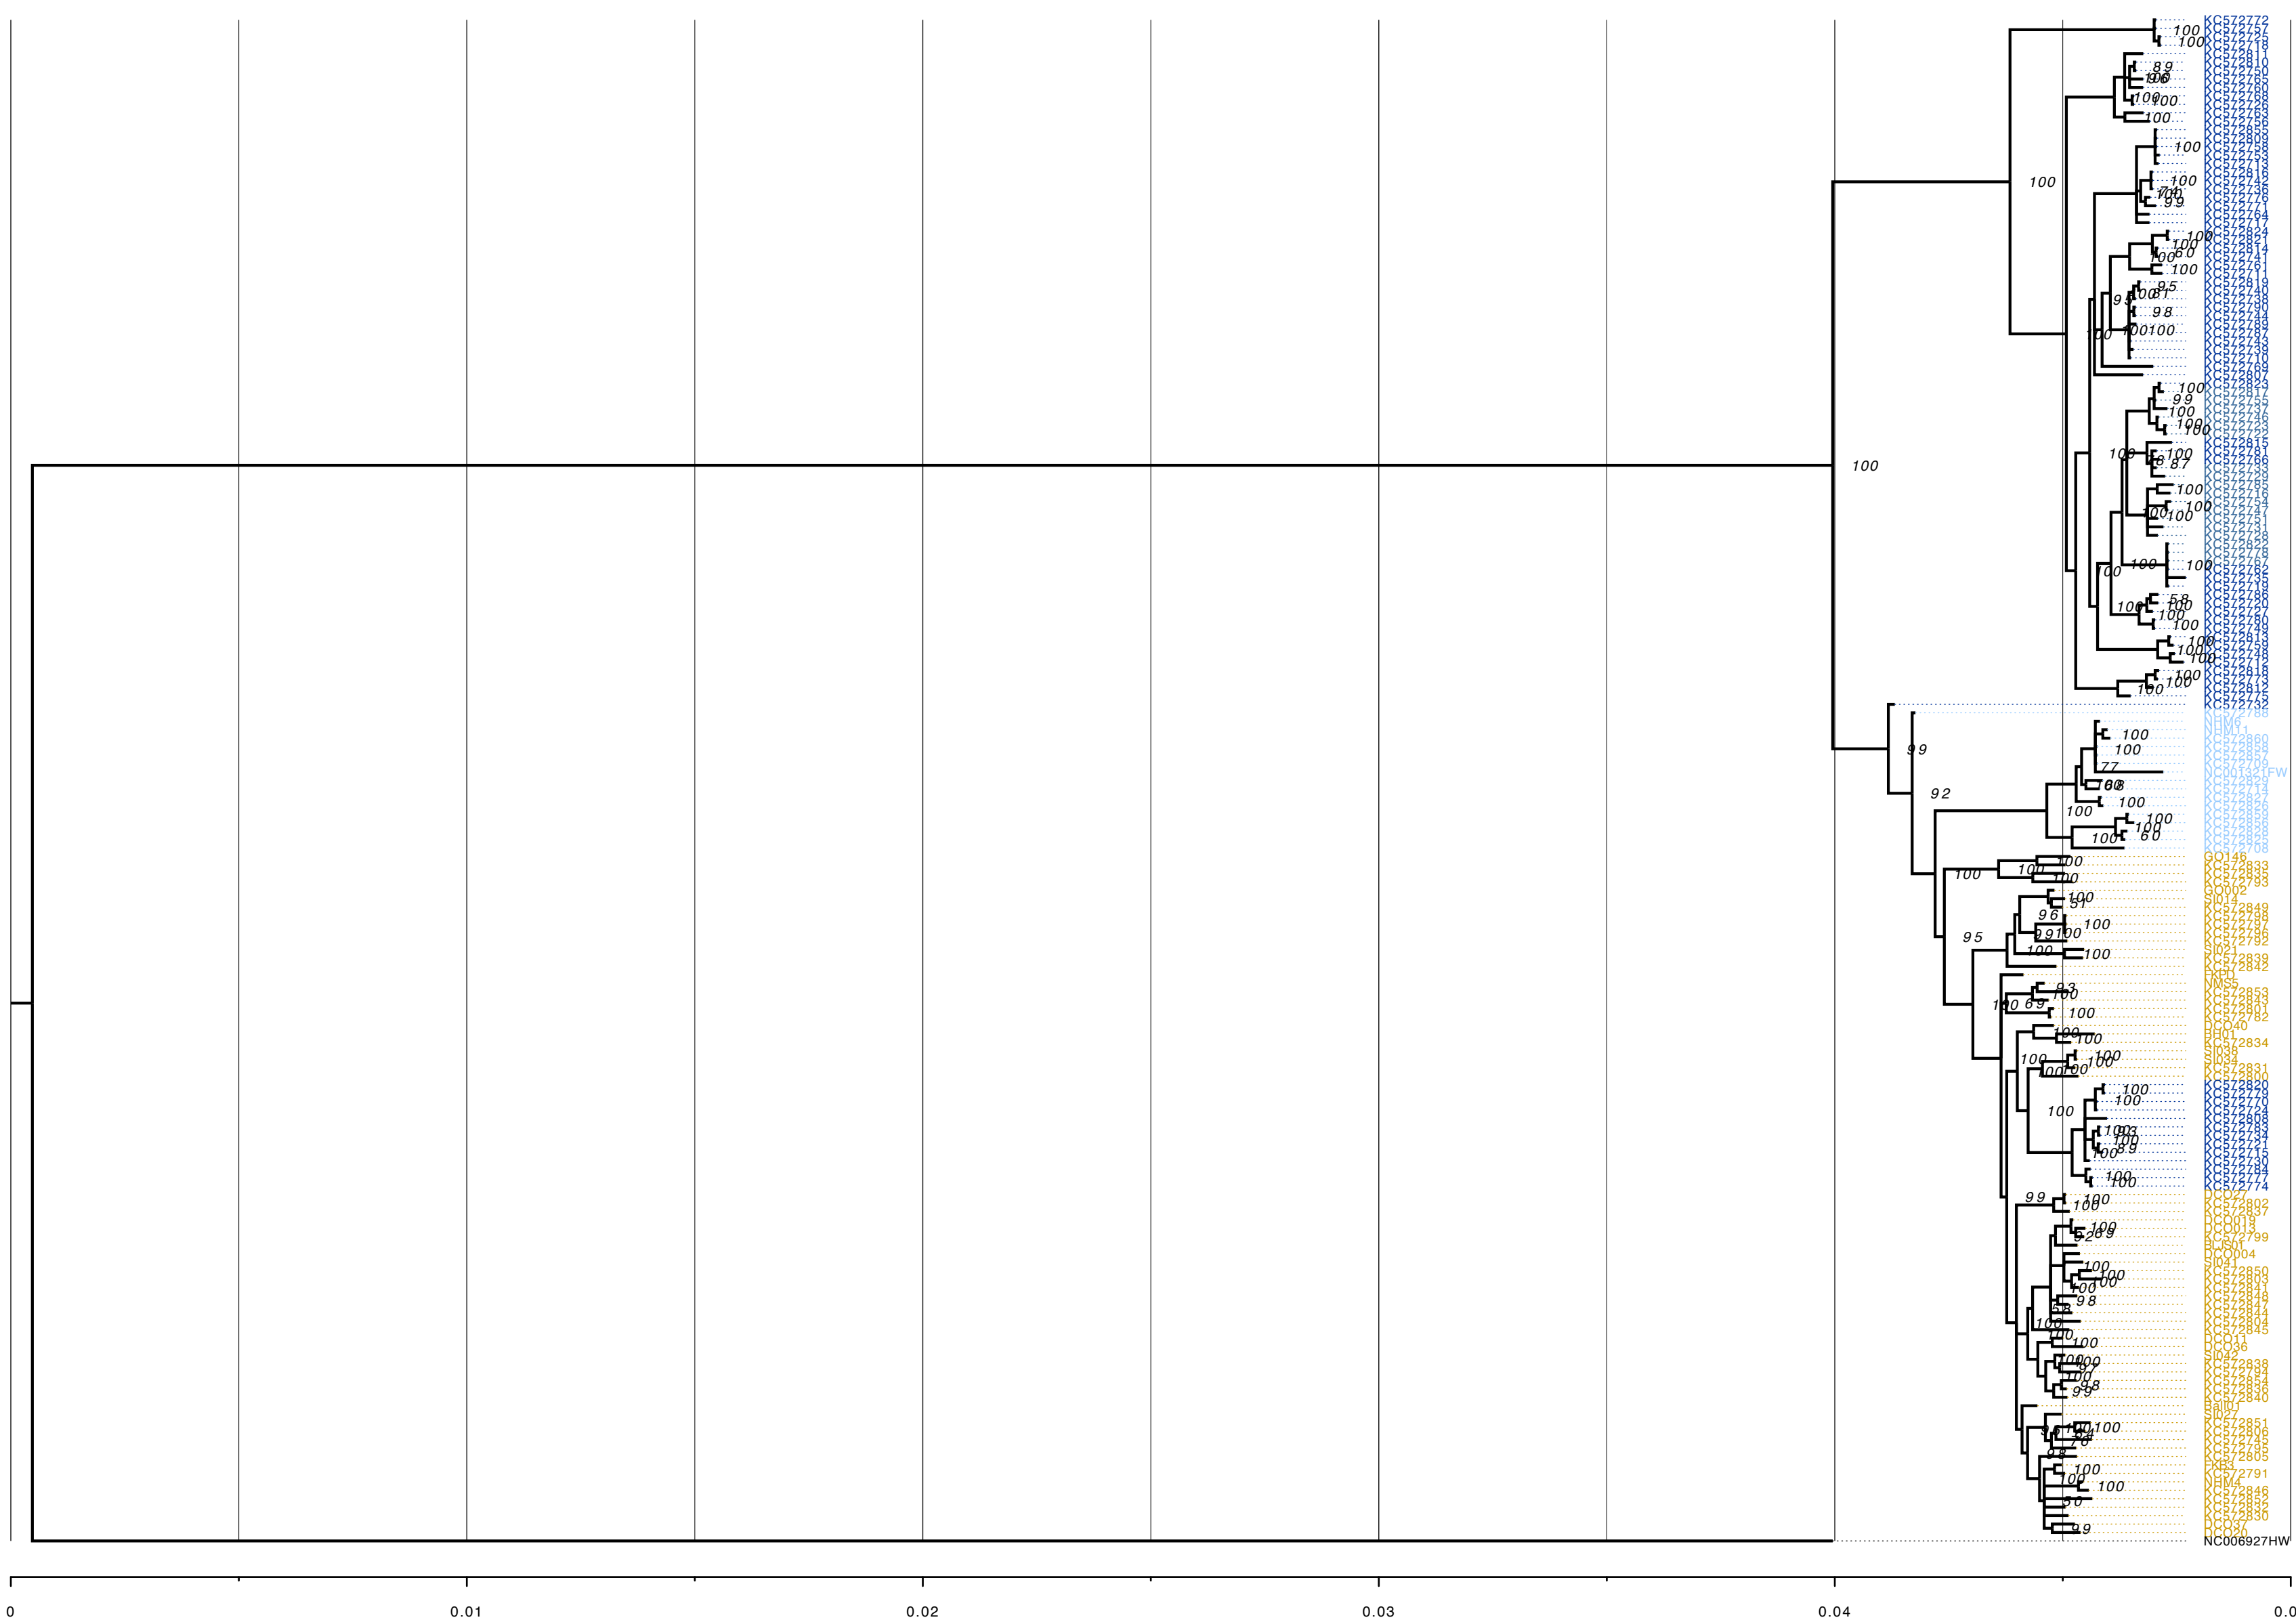

Supplement: s1 [file s1]
